# Supplementary material for: Improving the efficiency of all-polymer solar cells through morphology control via a combination approach: polar solvent additives and external electric field
Source: Royal Society of Chemistry journal article supplement (doi:10.1039/d4tc03983a), 2025-01-01
Supplement: d4tc03983a1.pdf [file d4tc03983a1.pdf]

## Supplementary Information

# **Improving the Efficiency of All-Polymer Solar Cells by Morphology Control via Combination Approach: Polar Solvent Additive and External Electric Field**

*Yina Moon, Nara Han, Minwoo Lee, Geon Chang Song, Dongseong Yang, Jeongwoo Beak,  
and Dong-Yu Kim\**

School of Materials Science and Engineering (SMSE)

Gwangju Institute of Science and Technology (GIST)

123 Cheomdangwagi-ro Buk-gu, Gwangju 61005, Republic of Korea

\* E-mail: [kimdy@gist.ac.kr](mailto:kimdy@gist.ac.kr)

**Donor**  
PTB7-Th

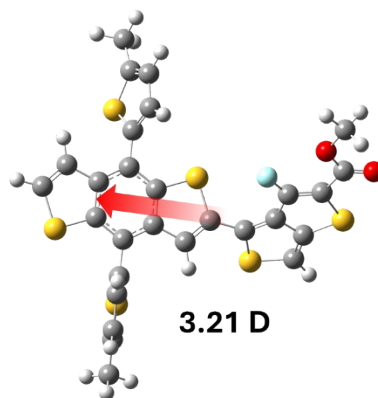

**Acceptor**  
P(NDI2OD-T2)

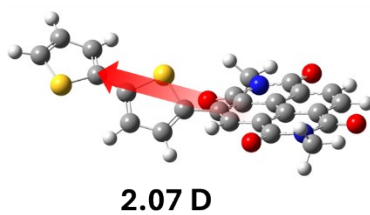

**Polar solvent additive**  
Acetonitrile

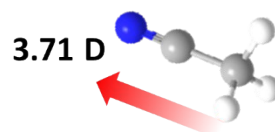

**Fig. S1.** Density functional theory (DFT) calculation result of active materials (donor and acceptor) and polar solvent additive in active solution

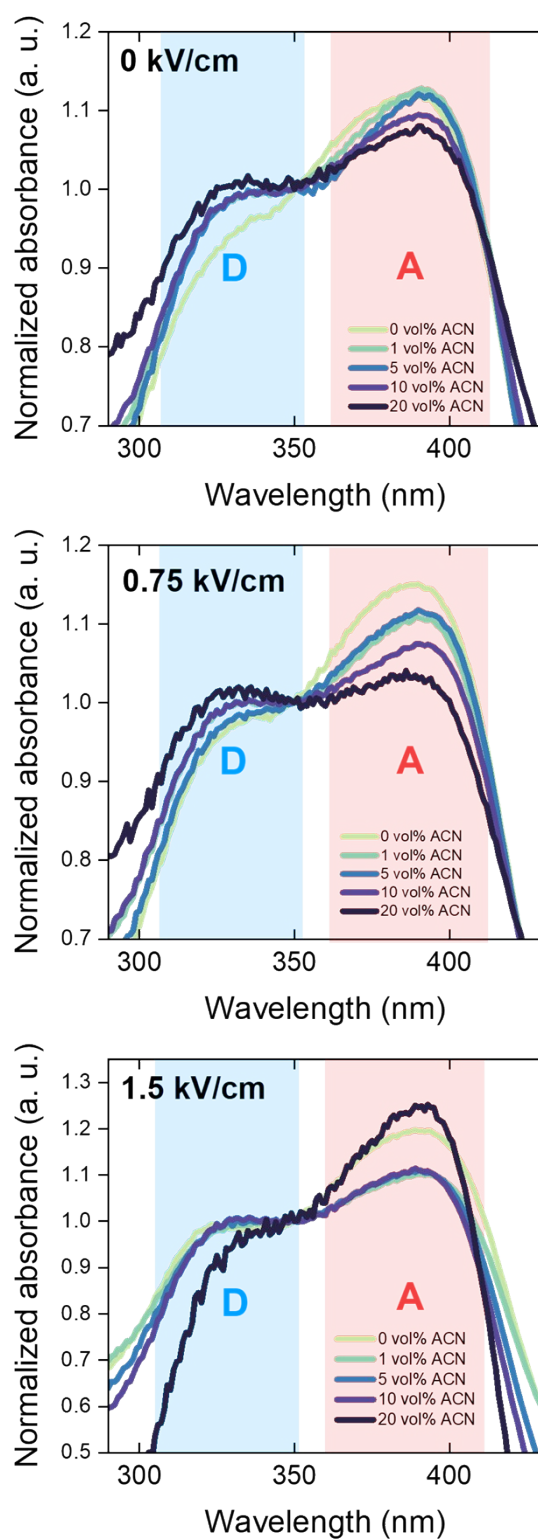

**Fig. S2.** The absorpton spectra of film samples in range of 280-450 nm depending on the external electric field voltages (0 kV/cm, 0.75 kv/cm, 1.5 kv/cm)

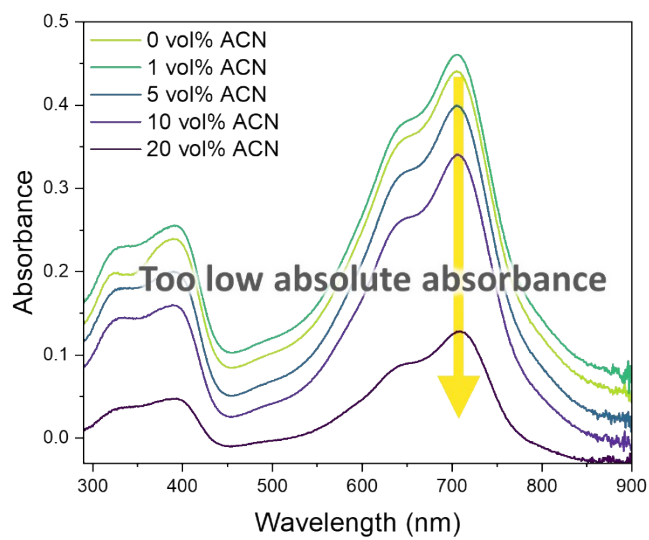

**Fig. S3.** Drastic reduction of absorption intensity depending on the increase of ACN ratio

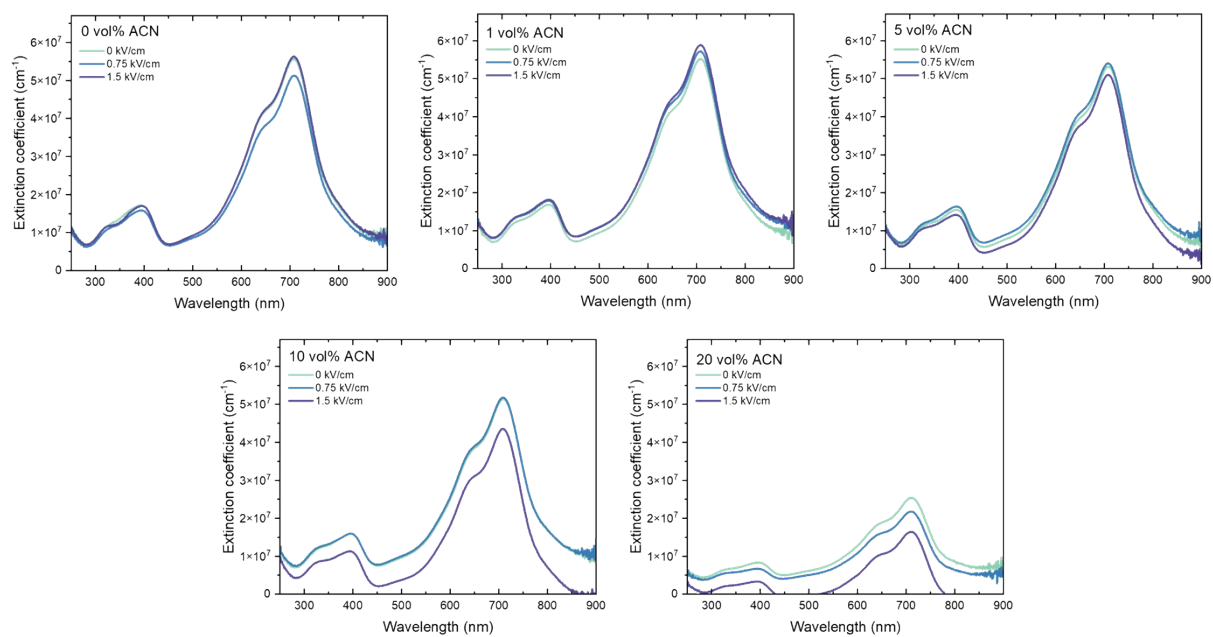

**Fig. S4.** The extinction coefficient of BHJ films with addition of solvent additive and external electric field treatment

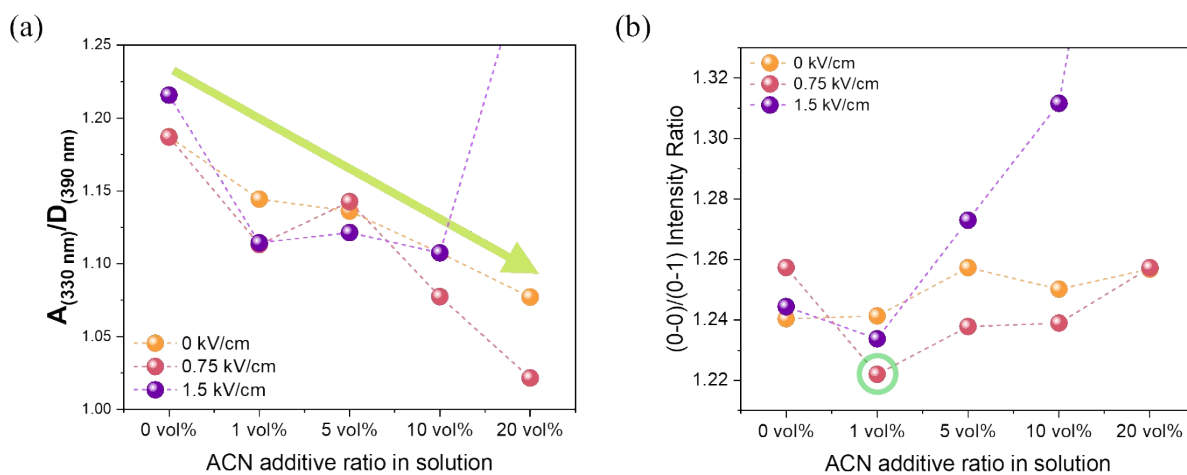

**Fig. S5.** (a) The trend of the absorption peak intensity of the acceptor (330 nm peak) relative to the donor (390 nm peak) (b) The trend of the (0-0)/(0-1) intensity ratio extracted from the absorption spectrum of donor

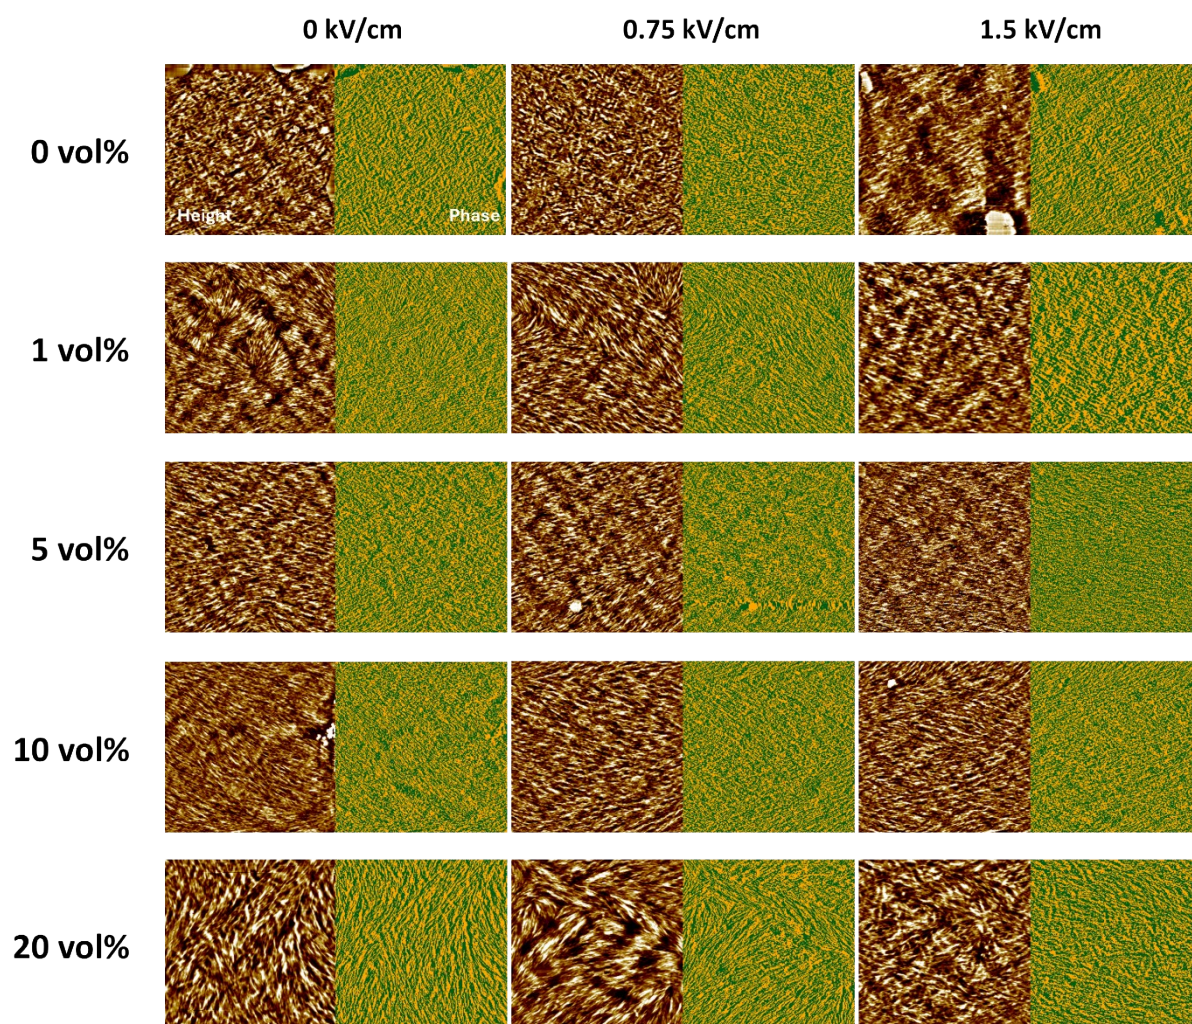

**Fig. S6.** The AFM images showing the surface morphology as a function of the ACN addition ratio and the voltage of the external electric field applied to the BHJ films, with phase images clearly discriminating the polymer fibrillar structure

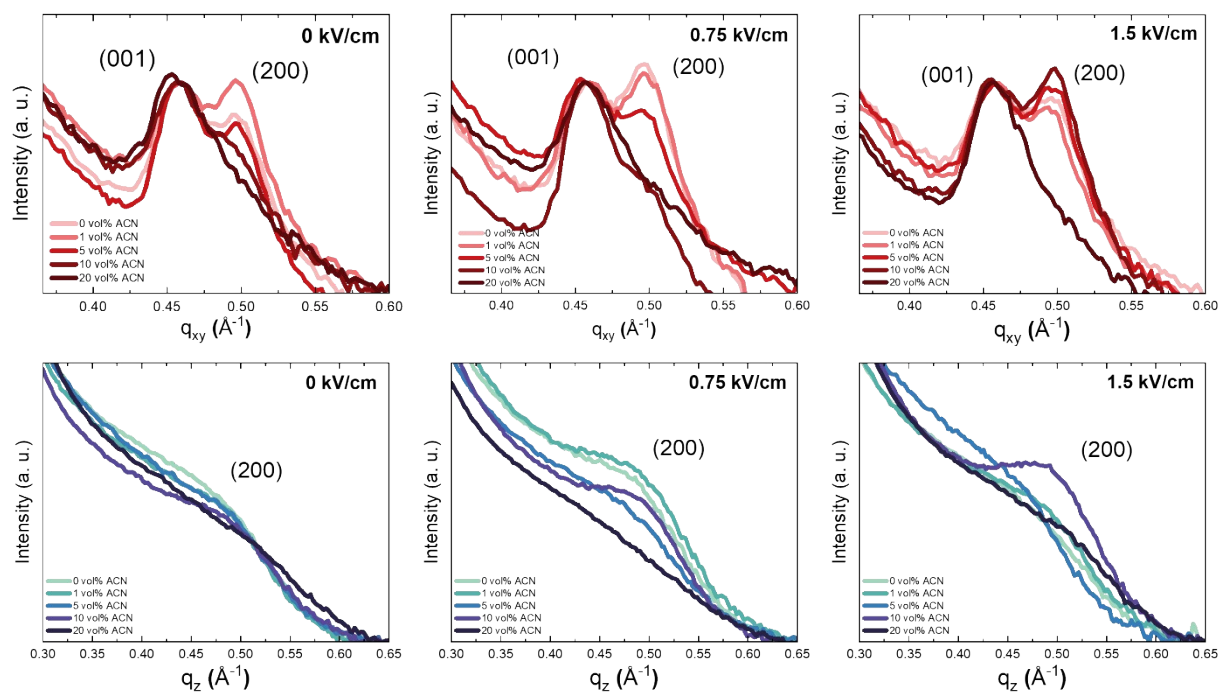

**Fig. S7.** Linecut graphs of GIWAXS data showing the crystallinity of the (200) crystal of P(NDI2OD-T2).



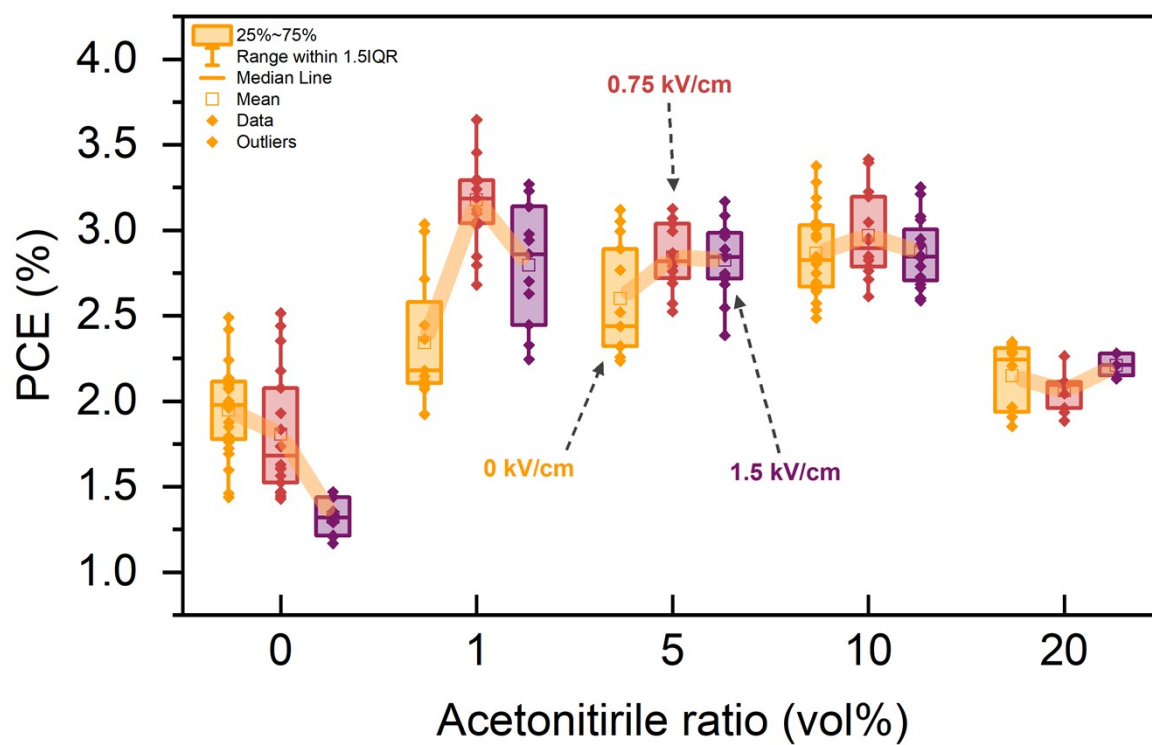

**Fig. S8.** Trend of power conversion efficiency (PCE) as a function of external electric field application and the volume ratio of acetonitrile
